# Supplementary material for: Sampling and weighting of the Austrian Psychiatric Prevalence Survey (APPS)
Source: Springer Nature journal article supplement (doi:10.1007/s40211-019-0305-6), 2019-04-03
Supplement: MOESM1 [file 16599822]

**Electronic Supplementary Material 1**  
**Sampling and Weighting of The Austrian Psychiatric Prevalence Survey (APPS)**  
**(Alexandrowicz, RW, Bacher J, Wancata J) Neuropsychiatrie, \*\*, \*\*\*-\*\*\***

Table S1: Population and target sample sizes of the selected districts aged 18–65 by sex. Notes: Percentages show the city shares per province. Bold entries denote provincial capitals; The numbers in angle brackets denote the official district numbers. Due to rounding errors, the total sample sizes are not 500 and 500 but rather 499 and 504.

| Province | District                          | District Population 18–65 |       |           |       | $\Sigma$  | Target Sample |     |
|----------|-----------------------------------|---------------------------|-------|-----------|-------|-----------|---------------|-----|
|          |                                   | m                         | %     | f         | %     |           | m             | f   |
| B        | <b>Eisenstadt (Stadt)</b> <101>   | 4,286                     | 8.2   | 4,563     | 8.7   | 8,849     | 1             | 2   |
| B        | Neusiedl am See <107>             | 18,621                    | 35.5  | 18,468    | 35.4  | 37,089    | 6             | 6   |
| B        | Oberpullendorf <108>              | 12,223                    | 23.3  | 11,795    | 22.6  | 24,018    | 4             | 4   |
| B        | Oberwart <109>                    | 17,329                    | 33.0  | 17,389    | 33.3  | 34,718    | 6             | 6   |
|          | Subtotal Burgenland               | 52,459                    | 100.0 | 52,215    | 100.0 | 104,674   | 17            | 17  |
| K        | <b>Klagenfurt (Stadt)</b> <201>   | 30,407                    | 38.8  | 33,271    | 41.4  | 63,678    | 12            | 13  |
| K        | Hermagor <203>                    | 5,801                     | 7.4   | 5,599     | 7.0   | 11,400    | 2             | 2   |
| K        | Sankt Veit an der Glan <205>      | 17,821                    | 22.7  | 17,312    | 21.5  | 35,133    | 7             | 7   |
| K        | Spittal an der Drau <206>         | 24,405                    | 31.1  | 24,256    | 30.2  | 48,661    | 10            | 10  |
|          | Subtotal Kärnten                  | 78,434                    | 100.0 | 80,438    | 100.0 | 158,872   | 32            | 32  |
| N        | Krems an der Donau (Stadt) <301>  | 7,863                     | 5.1   | 7,859     | 5.0   | 15,722    | 5             | 5   |
| N        | <b>Sankt Pölten (Stadt)</b> <302> | 16,619                    | 10.8  | 16,923    | 10.8  | 33,542    | 10            | 10  |
| N        | Wiener Neustadt (Stadt) <304>     | 13,638                    | 8.9   | 13,981    | 8.9   | 27,619    | 8             | 8   |
| N        | Bruck an der Leitha <307>         | 13,947                    | 9.1   | 14,101    | 9.0   | 28,048    | 9             | 8   |
| N        | Gmünd <309>                       | 11,906                    | 7.8   | 11,247    | 7.2   | 23,153    | 7             | 7   |
| N        | Krems Land <313>                  | 17,913                    | 11.7  | 17,850    | 11.4  | 35,763    | 11            | 11  |
| N        | Mödling <317>                     | 34,871                    | 22.8  | 37,277    | 23.7  | 72,148    | 21            | 22  |
| N        | Wien Umgebung <324>               | 36,415                    | 23.8  | 37,891    | 24.1  | 74,306    | 22            | 23  |
|          | Subtotal Niederösterreich         | 153,172                   | 100.0 | 157,129   | 100.0 | 310,301   | 94            | 93  |
| O        | <b>Linz (Stadt)</b> <401>         | 62,905                    | 34.3  | 64,701    | 35.6  | 127,606   | 29            | 29  |
| O        | Eferding <405>                    | 10,583                    | 5.8   | 10,210    | 5.6   | 20,793    | 5             | 5   |
| O        | Linz Land <410>                   | 46,295                    | 25.2  | 46,170    | 25.4  | 92,465    | 21            | 21  |
| O        | Perg <411>                        | 22,043                    | 12.0  | 21,129    | 11.6  | 43,172    | 10            | 10  |
| O        | Rohrbach <413>                    | 19,149                    | 10.4  | 17,494    | 9.6   | 36,643    | 9             | 8   |
| O        | Wels Land <418>                   | 22,666                    | 12.3  | 22,021    | 12.1  | 44,687    | 10            | 10  |
|          | Subtotal Oberösterreich           | 183,641                   | 100.0 | 181,725   | 100.0 | 365,366   | 84            | 82  |
| S        | <b>Salzburg (Stadt)</b> <501>     | 46,210                    | 38.9  | 49,389    | 40.1  | 95,599    | 12            | 13  |
| S        | Salzburg Umgebung <503>           | 47,370                    | 39.9  | 48,074    | 39.1  | 95,444    | 12            | 13  |
| S        | Sankt Johann im Pongau <504>      | 25,240                    | 21.2  | 25,617    | 20.8  | 50,857    | 7             | 7   |
|          | Subtotal Salzburg                 | 118,820                   | 100.0 | 123,080   | 100.0 | 241,900   | 31            | 32  |
| ST       | <b>Graz (Stadt)</b> <601>         | 92,126                    | 48.1  | 92,575    | 49.2  | 184,701   | 35            | 35  |
| ST       | Hartberg-Fürstenfeld <622>        | 29,873                    | 15.6  | 28,550    | 15.2  | 58,423    | 11            | 11  |
| ST       | Murtal <620>                      | 23,257                    | 12.1  | 22,559    | 12.0  | 45,816    | 9             | 9   |
| ST       | Voitsberg <616>                   | 16,777                    | 8.8   | 16,472    | 8.7   | 33,249    | 6             | 6   |
| ST       | Weiz <617>                        | 29,454                    | 15.4  | 28,190    | 15.0  | 57,644    | 11            | 11  |
|          | Subtotal Steiermark               | 191,487                   | 100.0 | 188,346   | 100.0 | 379,833   | 72            | 71  |
| T        | <b>Innsbruck (Stadt)</b> <701>    | 41,841                    | 50.7  | 43,139    | 52.1  | 84,980    | 22            | 22  |
| T        | Landeck <706>                     | 14,615                    | 17.7  | 14,102    | 17.0  | 28,717    | 8             | 7   |
| T        | Lienz <707>                       | 15,682                    | 19.0  | 15,258    | 18.4  | 30,940    | 8             | 8   |
| T        | Reutte <708>                      | 10,399                    | 12.6  | 10,349    | 12.5  | 20,748    | 5             | 5   |
|          | Subtotal Tirol                    | 82,537                    | 100.0 | 82,848    | 100.0 | 165,385   | 43            | 43  |
| V        | Bludenz <801>                     | 20,115                    | 32.6  | 19,464    | 31.9  | 39,579    | 7             | 7   |
| V        | <b>Bregenz</b> <802>              | 41,630                    | 67.4  | 41,480    | 68.1  | 83,110    | 15            | 15  |
|          | Subtotal Vorarlberg               | 61,745                    | 100.0 | 60,944    | 100.0 | 122,689   | 22            | 22  |
| W        | Wien 7.Bezirk, Neubau <907>       | 11,149                    | 9.4   | 11,752    | 9.4   | 22,901    | 10            | 10  |
| W        | Wien 8.Bezirk, Josefstadt <908>   | 8,940                     | 7.6   | 8,863     | 7.1   | 17,803    | 8             | 8   |
| W        | Wien 11.Bezirk, Simmering <911>   | 30,813                    | 26.0  | 31,306    | 25.2  | 62,119    | 27            | 27  |
| W        | Wien 17.Bezirk, Hernals <917>     | 18,653                    | 15.8  | 18,751    | 15.1  | 37,404    | 17            | 16  |
| W        | Wien 19.Bezirk, Döbling <919>     | 20,120                    | 17.0  | 22,357    | 18.0  | 42,477    | 18            | 20  |
| W        | Wien 23.Bezirk, Liesing <923>     | 28,702                    | 24.2  | 31,447    | 25.3  | 60,149    | 26            | 27  |
|          | Subtotal Wien                     | 118,377                   | 100.0 | 124,476   | 100.0 | 242,853   | 105           | 108 |
|          | Total Austria                     | 1.040,672                 |       | 1.051,201 |       | 2.091,873 | 499           | 504 |

Table S2: Weighting Examples

The following two tables show examples of the weighting effect upon the results. The weight

- $W_d^{(mf)}$  is the district based population projection weight according to Equation (9) of the article,
- $w_d^{(mf)}$  is the district based sample weight according to Equation (10),
- $w_a^{(mf)}$  is the target weight for age according to Equation (12), and
- $w_{da}^{(mf)}$  is the district based target weight for age according to Equation (13).

| Response Category             | not weighted |       |         | weighted by $W_d^{(mf)}$ |       |         | weighted by $w_d^{(mf)}$ |       |         | weighted by $w_a^{(mf)}$ |       |         | weighted by $w_{da}^{(mf)}$ |       |         |
|-------------------------------|--------------|-------|---------|--------------------------|-------|---------|--------------------------|-------|---------|--------------------------|-------|---------|-----------------------------|-------|---------|
|                               | <i>n</i>     | %     | valid % | <i>n</i>                 | %     | valid % | <i>n</i>                 | %     | valid % | <i>n</i>                 | %     | valid % | <i>n</i>                    | %     | valid % |
| solitarily                    | 215          | 21.3  | 21.4    | 1,156,564                | 20.8  | 20.9    | 210                      | 20.8  | 20.9    | 205                      | 20.3  | 20.4    | 201                         | 20.0  | 20.0    |
| with spouse or partner        | 351          | 34.8  | 34.9    | 1,896,757                | 34.1  | 34.2    | 344                      | 34.1  | 34.2    | 310                      | 30.8  | 30.8    | 303                         | 30.2  | 30.3    |
| with children and partner     | 257          | 25.5  | 25.5    | 1,549,527                | 27.9  | 28.0    | 281                      | 27.9  | 28.0    | 275                      | 27.3  | 27.3    | 300                         | 29.9  | 30.0    |
| with children but not partner | 76           | 7.5   | 7.6     | 387,555                  | 7.0   | 7.0     | 70                       | 7.0   | 7.0     | 78                       | 7.7   | 7.7     | 69                          | 6.9   | 6.9     |
| with other relatives          | 68           | 6.7   | 6.8     | 386,515                  | 7.0   | 7.0     | 70                       | 7.0   | 7.0     | 90                       | 8.9   | 9.0     | 92                          | 9.1   | 9.1     |
| multiperson household (*)     | 31           | 3.1   | 3.1     | 123,127                  | 2.2   | 2.2     | 22                       | 2.2   | 2.2     | 39                       | 3.9   | 3.9     | 28                          | 2.8   | 2.8     |
| institutional                 | 1            | .1    | .1      | 7,091                    | .1    | .1      | 1                        | .1    | .1      | 2                        | .2    | .2      | 2                           | .2    | .2      |
| other                         | 6            | .6    | .6      | 34,143                   | .6    | .6      | 6                        | .6    | .6      | 6                        | .6    | .6      | 6                           | .6    | .6      |
| unknown                       | 1            | .1    | .1      | 1,662                    | .0    | .0      | 0                        | .0    | .0      | 2                        | .1    | .1      | 0                           | .0    | .0      |
| $\Sigma$ valid                | 1006         | 99.8  | 100.0   | 5,542,941                | 99.8  | 100.0   | 1006                     | 99.8  | 100.0   | 1005                     | 99.8  | 100     | 1002                        | 99.8  | 100.0   |
| missing                       | 2            | .2    |         | 11,290                   | .2    |         | 2                        | .2    |         | 2                        | .2    |         | 2                           | .2    |         |
| $\Sigma$                      | 1008         | 100.0 |         | 5,554,231                | 100.0 |         | 1008                     | 100.0 |         | (†) 1007                 | 100.0 |         | 1004                        | 100.0 |         |

(\*) including flat-mates, but not therapeutic residential community; (†) for one respondent, age was missing and could, therefore, not be considered for age based weighting

| Response Category | not weighted |       |         | weighted by $W_d^{(mf)}$ |       |         | weighted by $w_d^{(mf)}$ |       |         | weighted by $w_a^{(mf)}$ |       |         | weighted by $w_{da}^{(mf)}$ |       |         |
|-------------------|--------------|-------|---------|--------------------------|-------|---------|--------------------------|-------|---------|--------------------------|-------|---------|-----------------------------|-------|---------|
|                   | <i>n</i>     | %     | valid % | <i>n</i>                 | %     | valid % | <i>n</i>                 | %     | valid % | <i>n</i>                 | %     | valid % | <i>n</i>                    | %     | valid % |
| no                | 717          | 71.1  | 74.0    | 3,877,060                | 69.8  | 72.6    | 704                      | 69.8  | 72.6    | 737                      | 73.2  | 75.7    | 719                         | 71.6  | 73.9    |
| yes               | 252          | 25.0  | 26.0    | 1,462,052                | 26.3  | 27.4    | 265                      | 26.3  | 27.4    | 237                      | 23.6  | 24.3    | 254                         | 25.3  | 26.1    |
| $\Sigma$ valid    | 969          | 96.1  | 100.0   | 5,339,112                | 96.1  | 100.0   | 969                      | 96.1  | 100.0   | 974                      | 96.8  | 100.0   | 973                         | 96.9  | 100.0   |
| missing           | 39           | 3.9   |         | 215,119                  | 3.9   |         | 39                       | 3.9   |         | 33                       | 3.2   |         | 31                          | 3.1   |         |
| $\Sigma$          | 1008         | 100.0 |         | 5,554,231                | 100.0 |         | 1008                     | 100.0 |         | 1007                     | 100.0 |         | 1004                        | 100.0 |         |

**Example 2: Do you practice voluntary/unpaid work on a regular basis?**
